# Supplementary material
Source: publisher figshare collection journal article supplement (https://diabetesjournals.figshare.com/articles/dataset/_/20278056)

Online-Only Supplemental Material

Predictors of the Initiation of Islet Autoimmunity, Progression to Multiple Autoantibodies and Clinical Diabetes: The TEDDY Study

Jeffrey P. Krischer, Xiang Liu, Åke Lernmark, William A. Hagopian, Marian J. Rewers, Jin-Xiong She, Jorma Toppari, Anette-G. Ziegler, Beena Akolkar, on behalf of the TEDDY Study Group

Supplemental Figure S1. Progression from single ab+ to multiple ab+ by age at seroconversion among subjects (a) with MIAA or GADA (n=678, log-rank test, p<0.0001), (b) with IAA only at seroconversion (n=308, log-rank test, p<0.0001), and (c) with GADA only at seroconversion (n=370, log-rank test, p=0.0002).

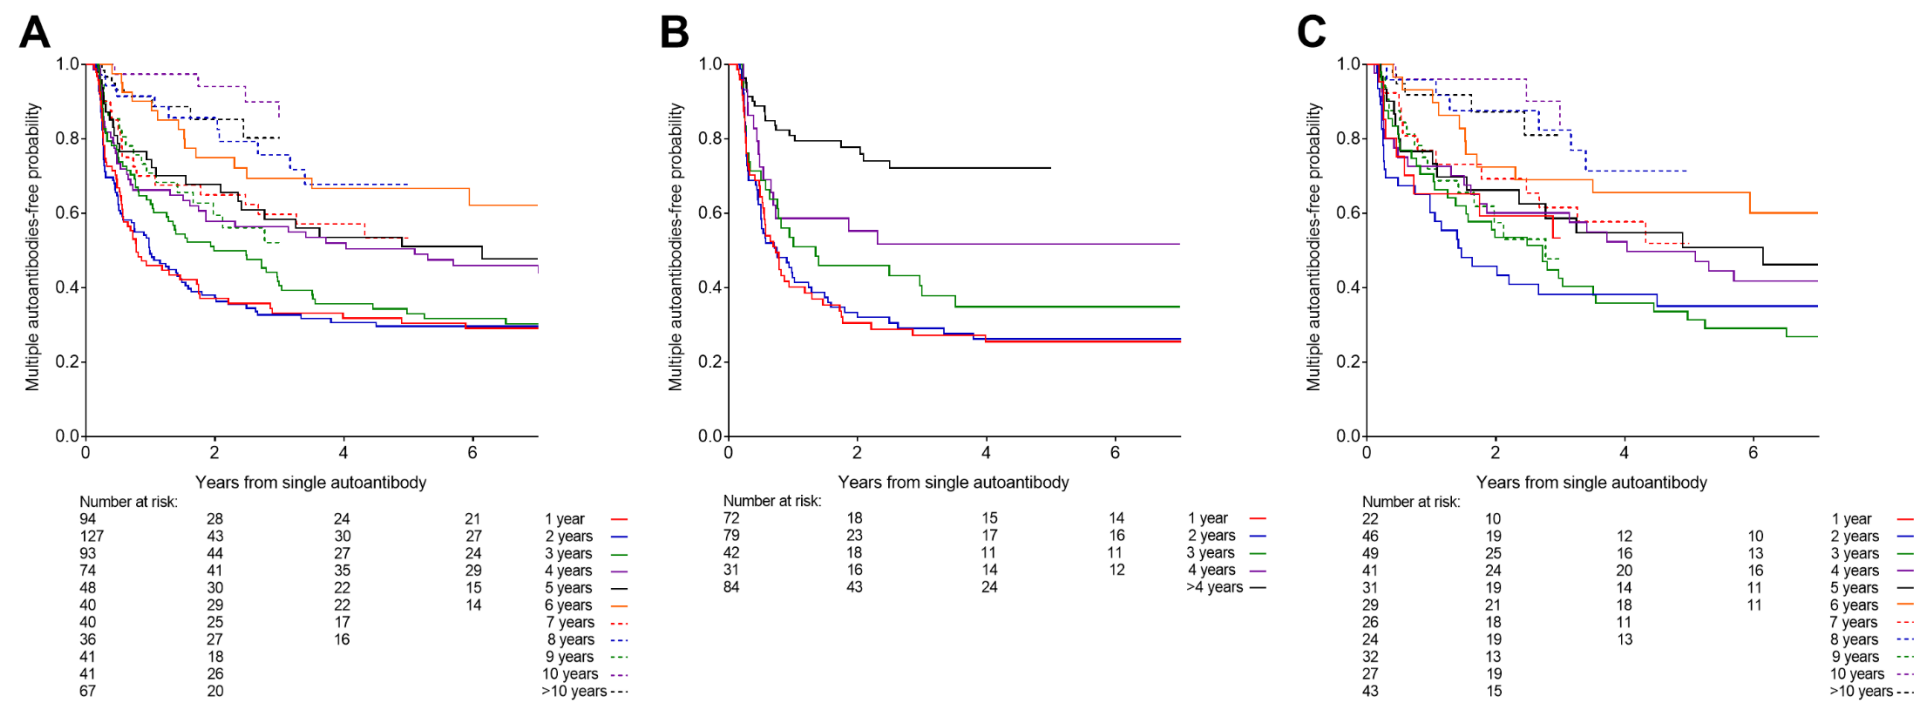

Supplemental Figure S2. Progression from multiple ab+ to type 1 diabetes by age at seroconversion.

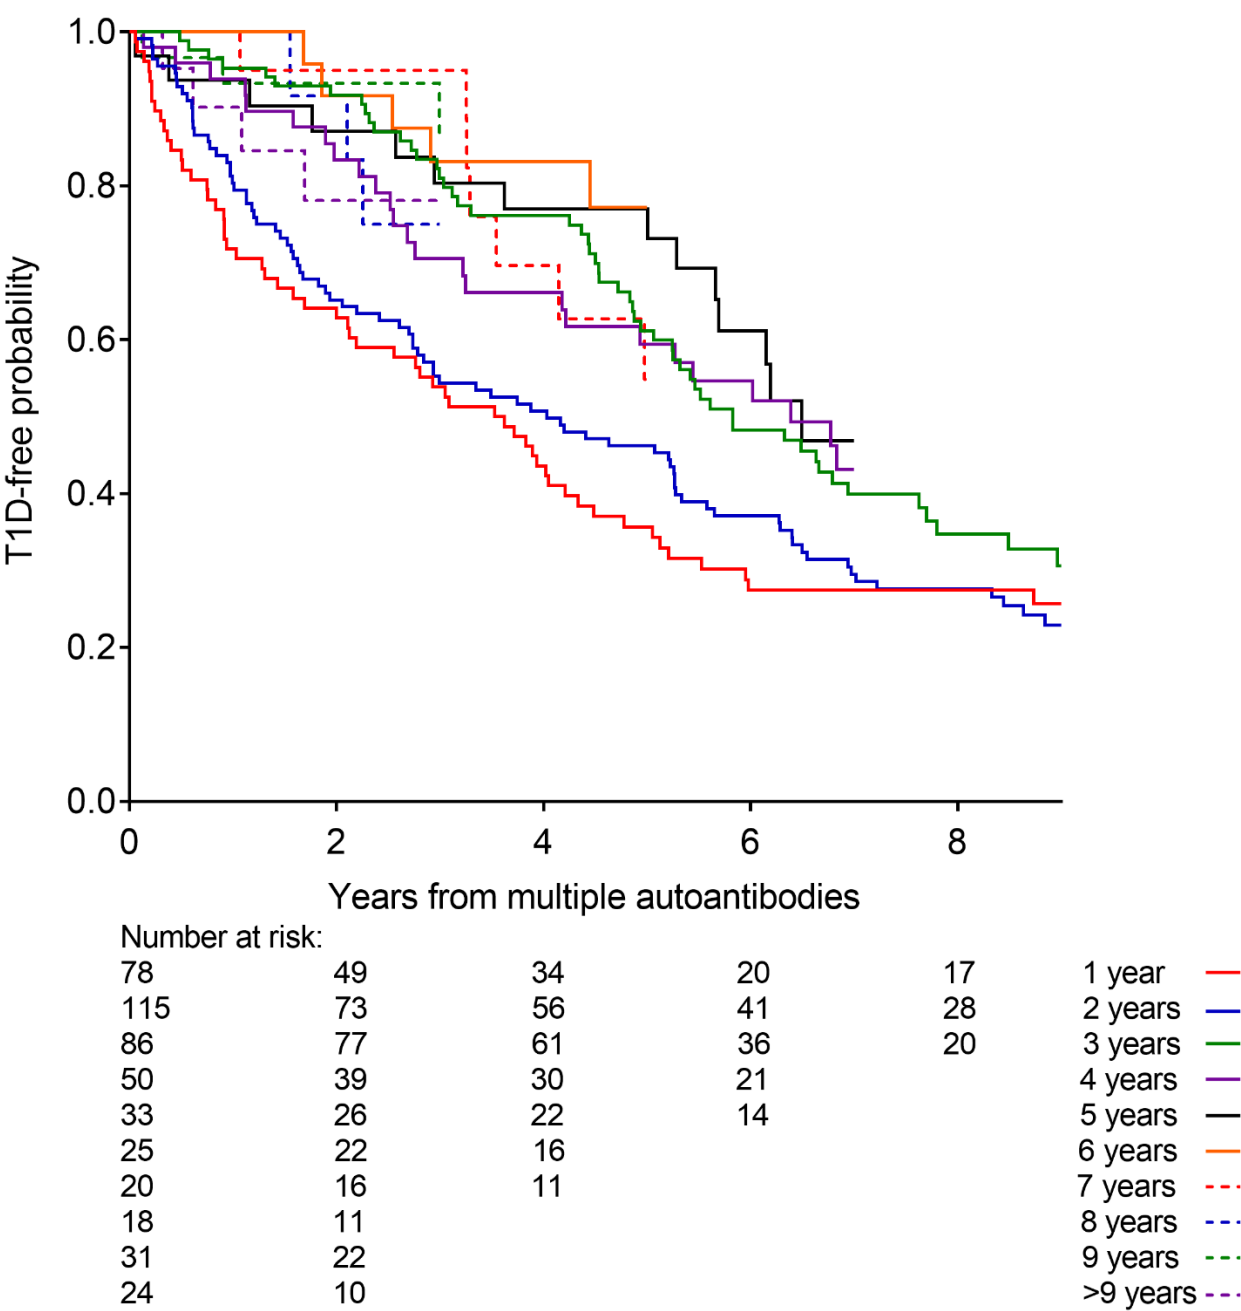

Supplement: Supplementary file 2 [file 1]
